# Supplementary material for: Longitudinal Analysis Between Maternal Feeding Practices and Body Mass Index (BMI): A Study in Asian Singaporean Preschoolers
Source: PubMed Central journal article supplement (PMC6454195; doi:10.3389/fnut.2019.00032), 2019-04-02
Supplement: Image_1.pdf [file Image_1.pdf]

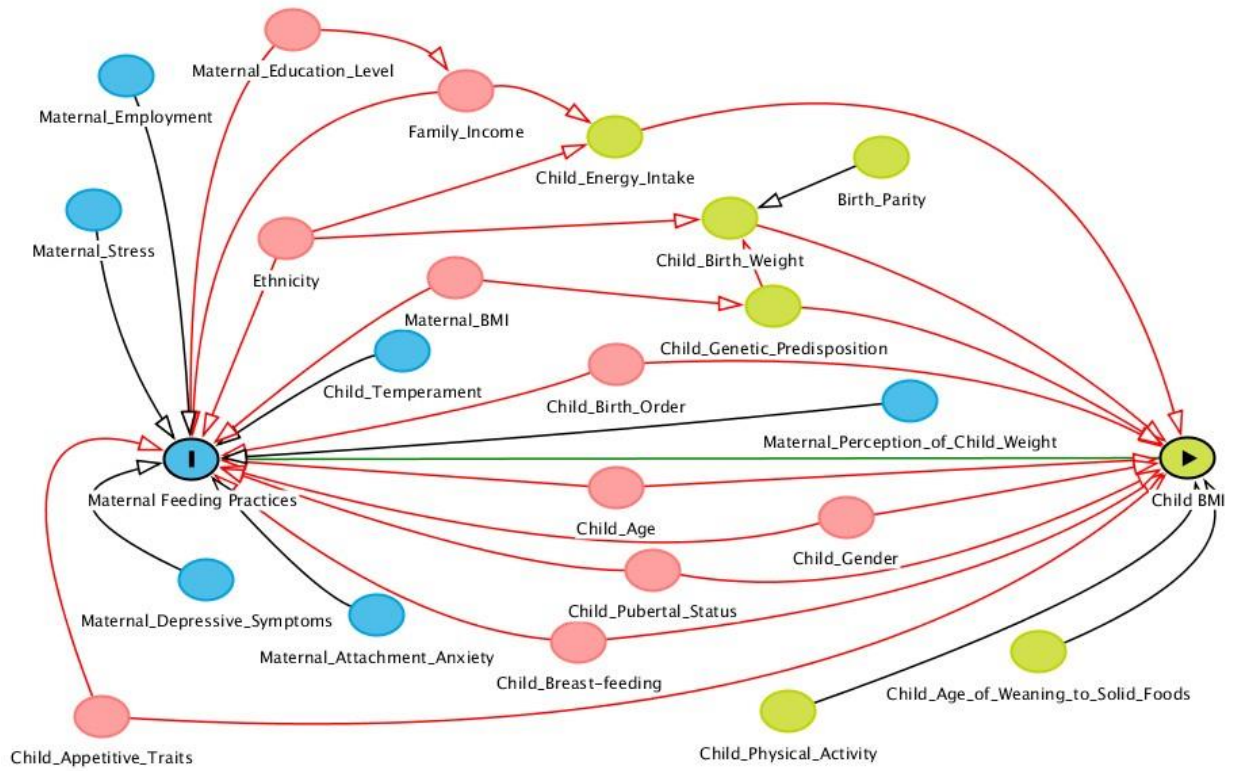

Supplementary Figure 1: The Direct Acyclic Graph (DAG)
