# Supplementary material for: Longitudinal Analysis Between Maternal Feeding Practices and Body Mass Index (BMI): A Study in Asian Singaporean Preschoolers
Source: PubMed Central journal article supplement (PMC6454195; doi:10.3389/fnut.2019.00032), 2019-04-02
Supplement: Table_1.pdf [file Table_1.pdf]

Supplementary Table 1: Correlations between subscales encouraging balance and variety, restriction for weight and pressure to eat at 5 years of age with maternal feeding practices subscales at 3 years of age <sup>1</sup>.

| <b>Maternal feeding practices at 3 years</b> | Difficulty in Child Feeding | Concern about Child Overeating or Being Overweight | Pushing the Child to Eat More | Using Food to Calm the Child | Concern about Child Being Underweight |
|----------------------------------------------|-----------------------------|----------------------------------------------------|-------------------------------|------------------------------|---------------------------------------|
| <b>Maternal feeding practices at 5 years</b> |                             |                                                    |                               |                              |                                       |
| Encouraging balance and variety              | -0.08                       | -0.11*                                             | 0.13*                         | 0.01                         | -0.04                                 |
| Restriction for weight                       | -0.15*                      | 0.33*                                              | -0.03                         | 0.04                         | -0.07                                 |
| Pressure to eat                              | 0.15*                       | -0.10                                              | 0.20*                         | 0.18*                        | 0.13*                                 |

\*p<0.05 is statistically significant

<sup>1</sup> The three feeding practices subscales at year 5 were not significantly associated with any of the other subscales of the Preschoolers Feeding Questionnaire (PFQ) at year 3: Child's Control of Feeding Interactions, Structure during Feeding Interactions and Age-Inappropriate Feeding
