# Supplementary material for: Longitudinal Analysis Between Maternal Feeding Practices and Body Mass Index (BMI): A Study in Asian Singaporean Preschoolers
Source: PubMed Central journal article supplement (PMC6454195; doi:10.3389/fnut.2019.00032), 2019-04-02
Supplement: Table_2.pdf [file Table_2.pdf]

Supplementary Table 2: Characteristics of participants who were included (n=428) and excluded (n=724) from the analysis.

|                                      | <b>Included(n=428)</b> | <b>Excluded(n=724)</b> | <b>P value</b> |
|--------------------------------------|------------------------|------------------------|----------------|
| <b>Child characteristics</b>         |                        |                        |                |
| Sex (M),n(%)                         | 219(51)                | 352(53)                | 0.848          |
| Ethnicity, n(%)                      |                        |                        | <0.001         |
| Chinese                              | 201(47)                | 425(59)                |                |
| Malay                                | 138(32)                | 176(24)                |                |
| Indian                               | 89(21)                 | 123(17)                |                |
| <b>Maternal characteristics</b>      |                        |                        |                |
| Educational level, n(%)              |                        |                        | 0.361          |
| None/primary/secondary               | 119(28)                | 234(33)                |                |
| Post-secondary/tertiary              | 306(72)                | 478(67)                |                |
| Household income(SGD),n(%)           |                        |                        | 0.290          |
| 0-1999                               | 71(18)                 | 106(16)                |                |
| 1999-5999                            | 216(54)                | 393(58)                |                |
| >5999                                | 115(29)                | 175(26)                |                |
| Maternal age (years)                 | 30.6 ± 5.3             | 30.1 ± 5.1             | 0.740          |
| BMI at 15 weeks (kg/m <sup>2</sup> ) | 24.1 ± 5.0             | 22.5 ± 3.8             | 0.138          |
